# Supplementary material
Source: Springer Nature journal article supplement (https://www.springermedizin.de/resource/supplementary/12889_2012_3937_MOESM2_ESM.pdf/9490988)

List of eligible patients from 21 general practitioners recruited  
(n =8281)

Invitation letters sent to eligible patients  
(n= 8243)

Declined participation: n= 100  
No response: n= 3035  
Address changed: n= 414  
Deceased N= 17

Total responses received  
n= 4678

**Single Intervention**  
N=1238

**Single Control**  
N=1129

**Dual Intervention**  
N=1203

**Dual Control**  
N=1106

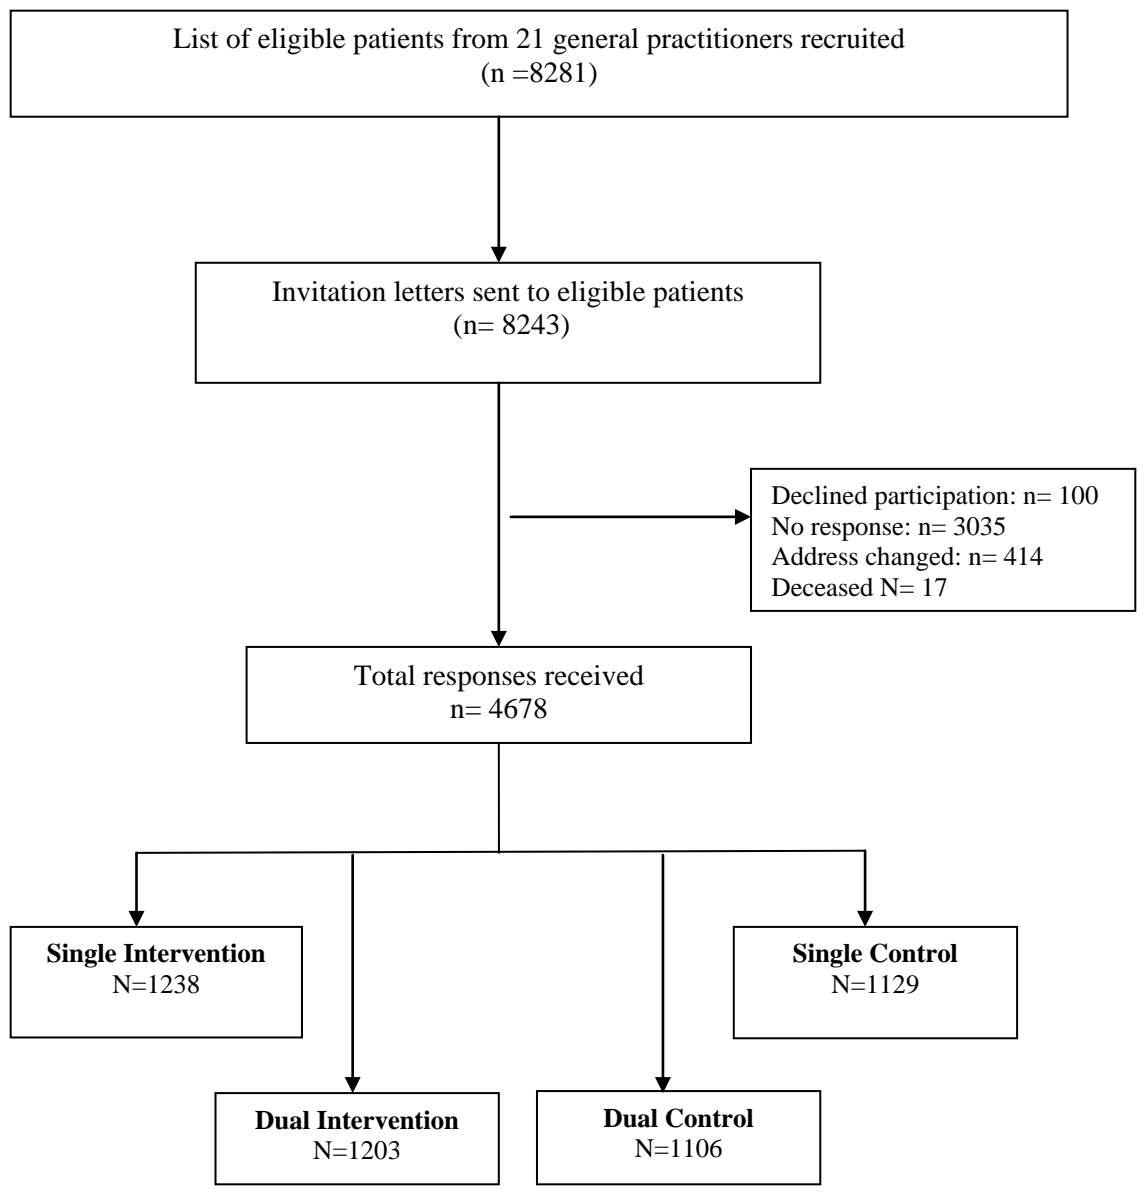

Supplement: MOESM2 [file 9490988]
